# Supplementary material for: Evaluating the RIST Molecular-Targeted Regimen in a Three-Dimensional Neuroblastoma Spheroid Cell Culture Model
Source: MDPI journal article supplement (doi:10.3390/cancers15061749), 2023-03-14

(a)

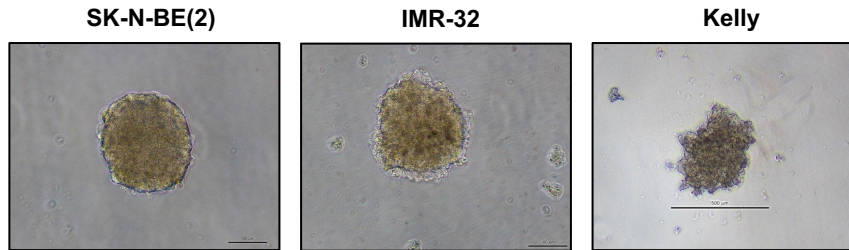

(b)

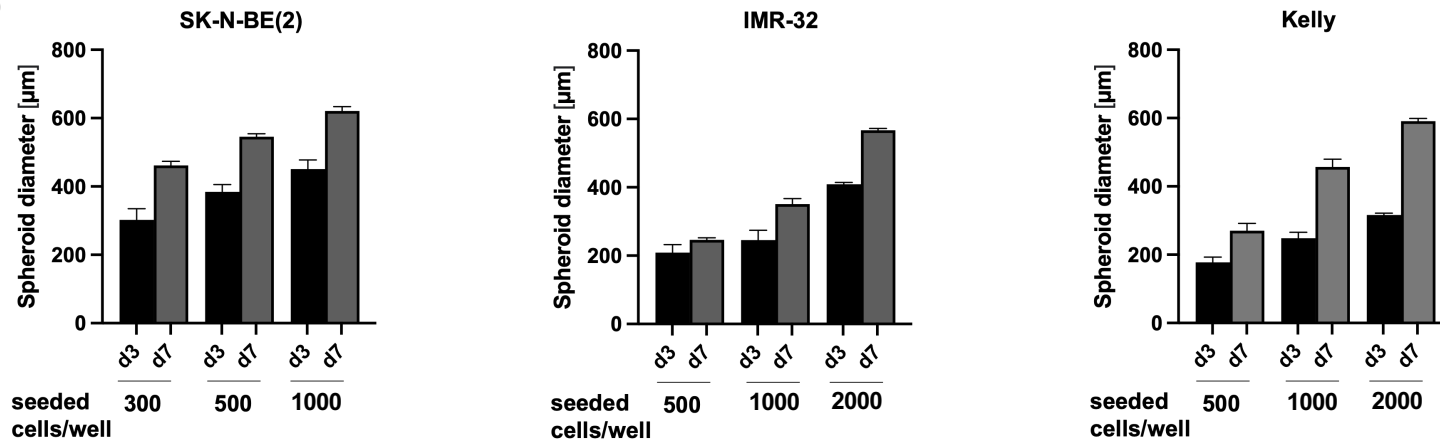

**Figure S1: Establishment of spheroid culture conditions.** (a) Phase-contrast images of SK-N-BE(2) (500 cells/96-well seeded), IMR-32 (1000 cells/96-well seeded), and Kelly (2000 cells/96-well seeded) spheroids grown for 3 days on round bottom 96-well ULA plates. Scale = 100  $\mu\text{m}$ , respectively 500  $\mu\text{m}$  for Kelly. (b) Analysis of the diameter of SK-N-BE(2) (left), IMR-32 (middle), and Kelly (right) spheroids seeded with increasing cell numbers on round bottom 96-well ULA plates for 3 days (d3) and 7 days (d7). At least two independent experiments ( $n=2$ ) in triplicates were performed.

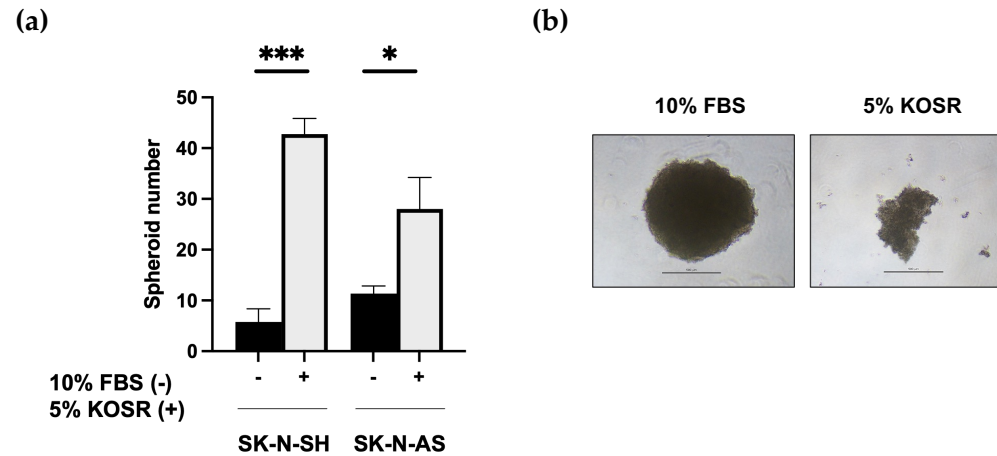

**Figure S2: Establishment of spheroid culture conditions.** (a) Number of SK-N-SH and SK-N-AS (1000 cells/well seeded) spheroids grown with 10% fetal bovine serum (FBS) (–) or with 5% knock-out serum replacement (KOSR) (+) as growth supplement on a flat bottom 96-well ULA plate. Number of spheroids were counted on day 7. Three independent experiments (n=3) in triplicates were performed. (b) Phase-contrast images of Kelly spheroids comparing growth with 10% fetal bovine serum (FBS) (–) or 5% knock-out serum replacement (KOSR) (+) on round bottom 96-well ULA plates (4000 cells/well seeded) for 10 days, scale = 500  $\mu$ M. Degrees of significance (unpaired student's t-test): \* < 0.05 and \*\*\* < 0.001.

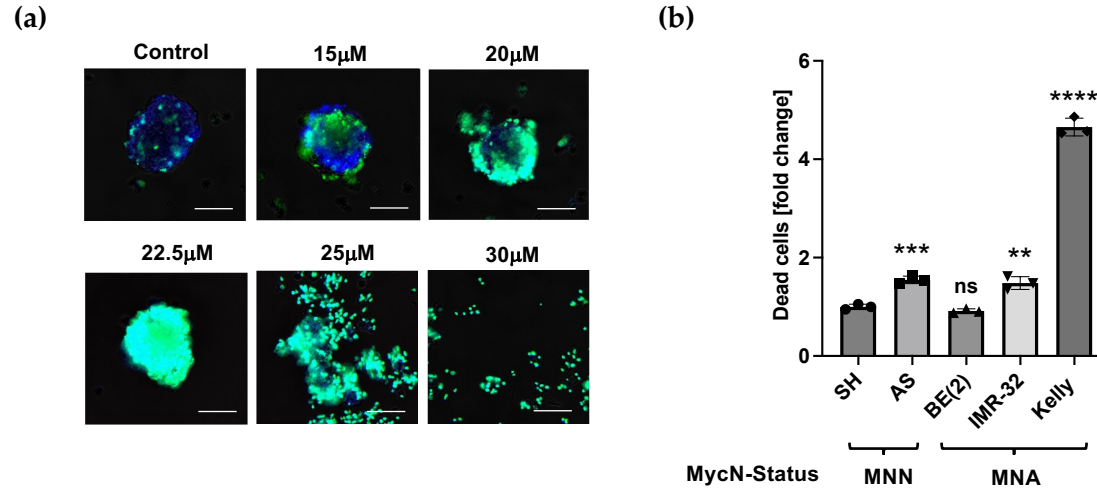

**Figure S3: Spheroid characterization.** (a) Inducing cell death in spheroids (SH-N-SH) by treatment with high and increasing concentrations of Rapamycin for 72h followed by staining with NucBlue Live ReadyProbes Reagent (cell-permeable, fluorescent after DNA binding, ThermoFisher #R37605) and CellTox Green Dye (excluded from viable cells, but preferentially stains dead cell's DNA, Promega #G8741). Control: treatment with vehicle. Pictures were taken applying the ZOE Fluorescent Cell Imager (Bio-Rad), scale = 100 µM. (b) CellTox Green Dye staining and fluorescence measurement on day 7 after of SK-N-SH (SH), SK-N-AS (AS), SK-N-BE(2) (BE(2)), IMR-32, and Kelly spheroids were seeded as shown in Table 1 and grown on round bottom 96-well ULA plates. Fold change compared to CellTox Green Dye signal of SK-N-SH spheroids. MycN-non-amplified (MNN), MycN-amplified (MNA). Representative results from two independent experiments in triplicates. Degrees of significance (unpaired student's t-test): \* < 0.05, \*\* < 0.01 and \*\*\* < 0.001.

The following pages contain all original immunoblot (IB)  
images as Supplementary Materials *Figure S4*

P-p70S6K (Thr389) and p70S6K, P-4E-BP (Ser65) and 4E-BP

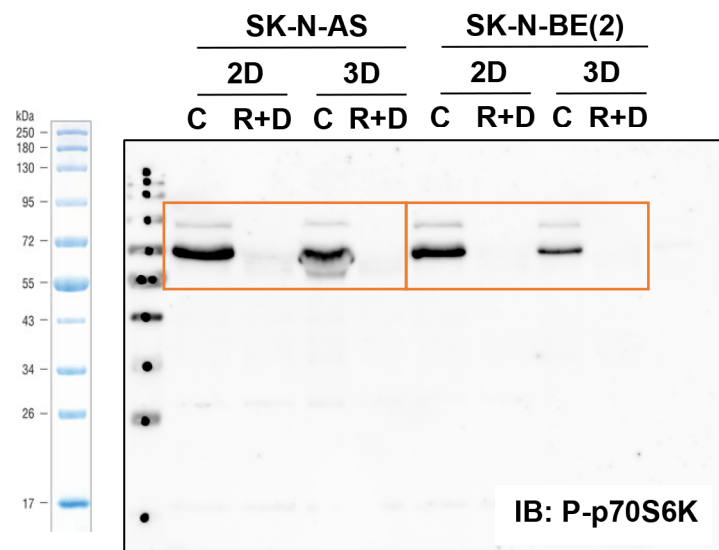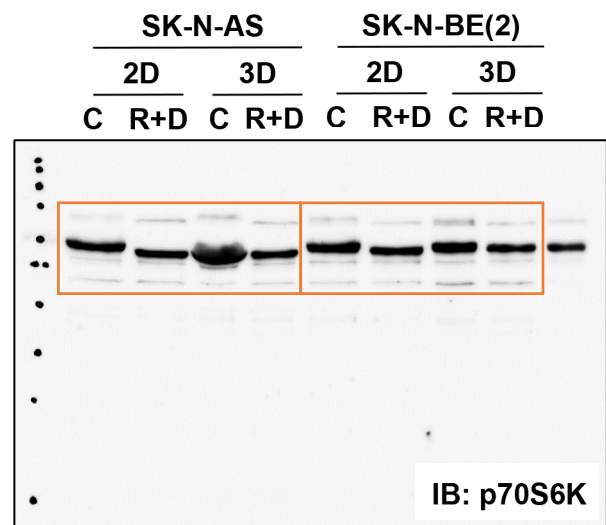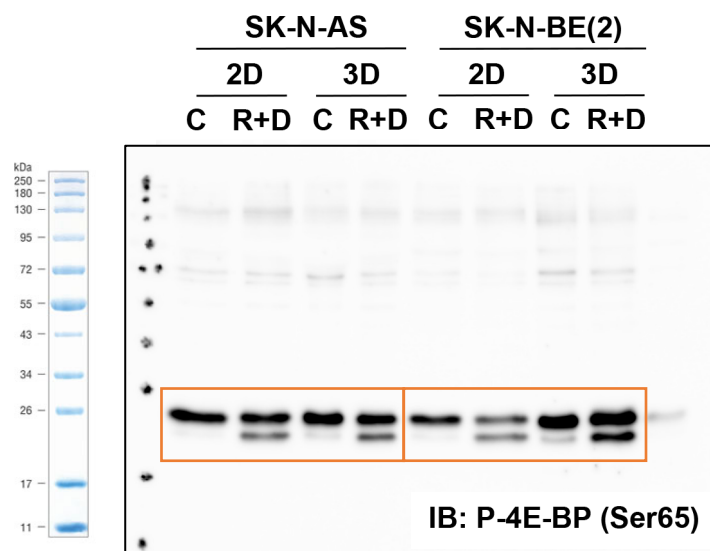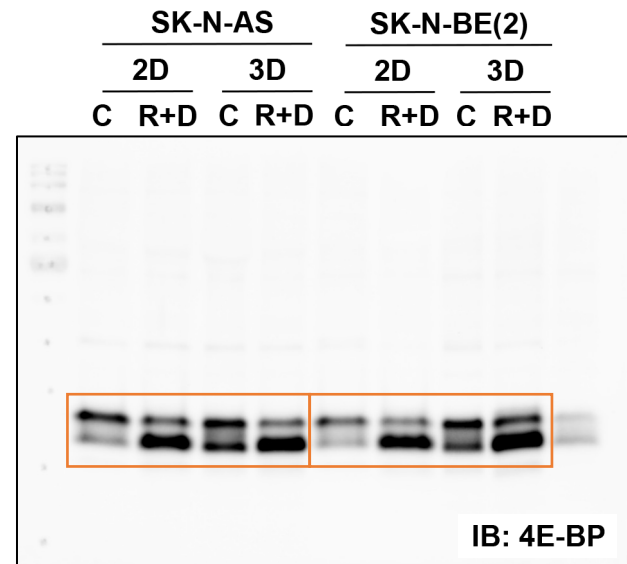

## P-Src (Tyr416) and Src, GAPDH

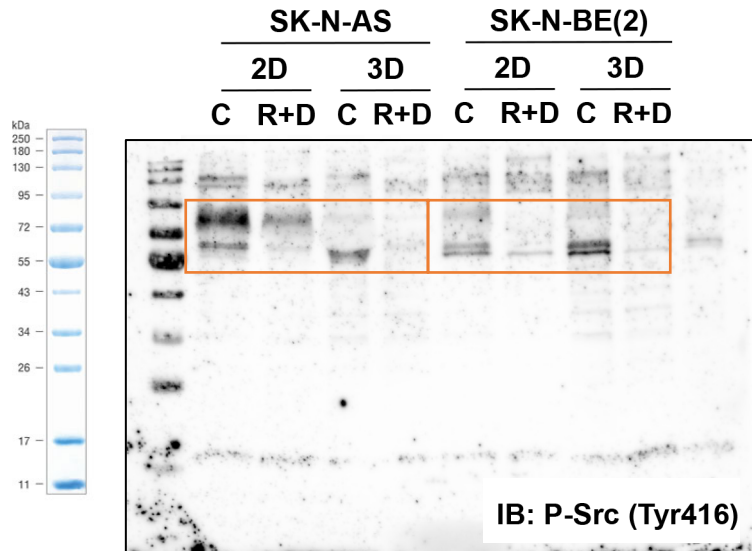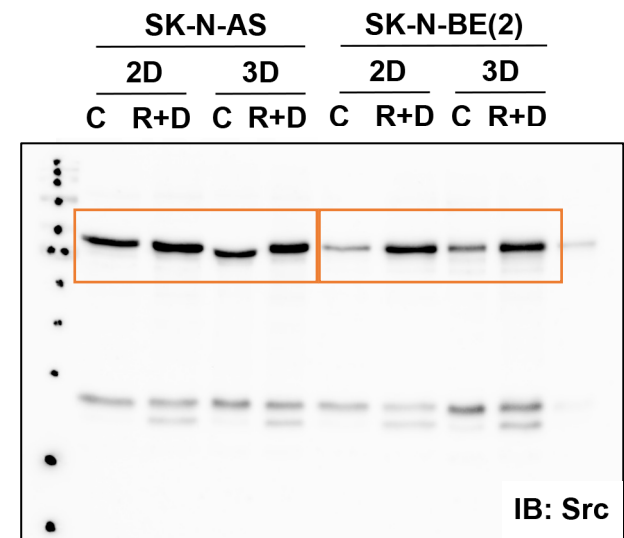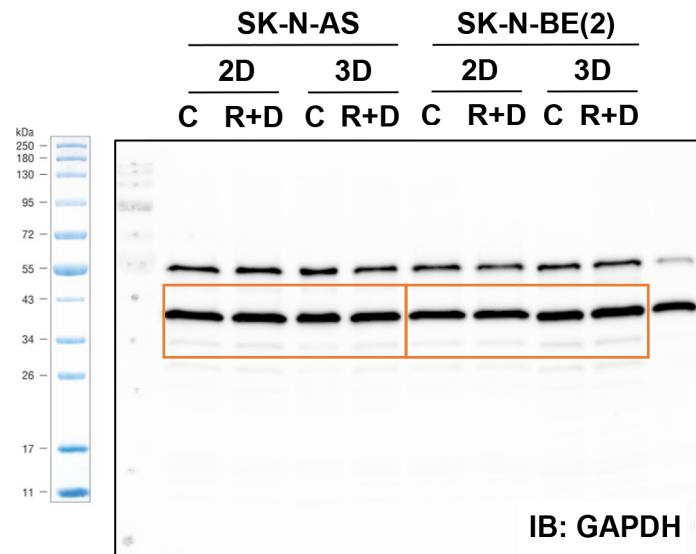

CXCR4, GAPDH

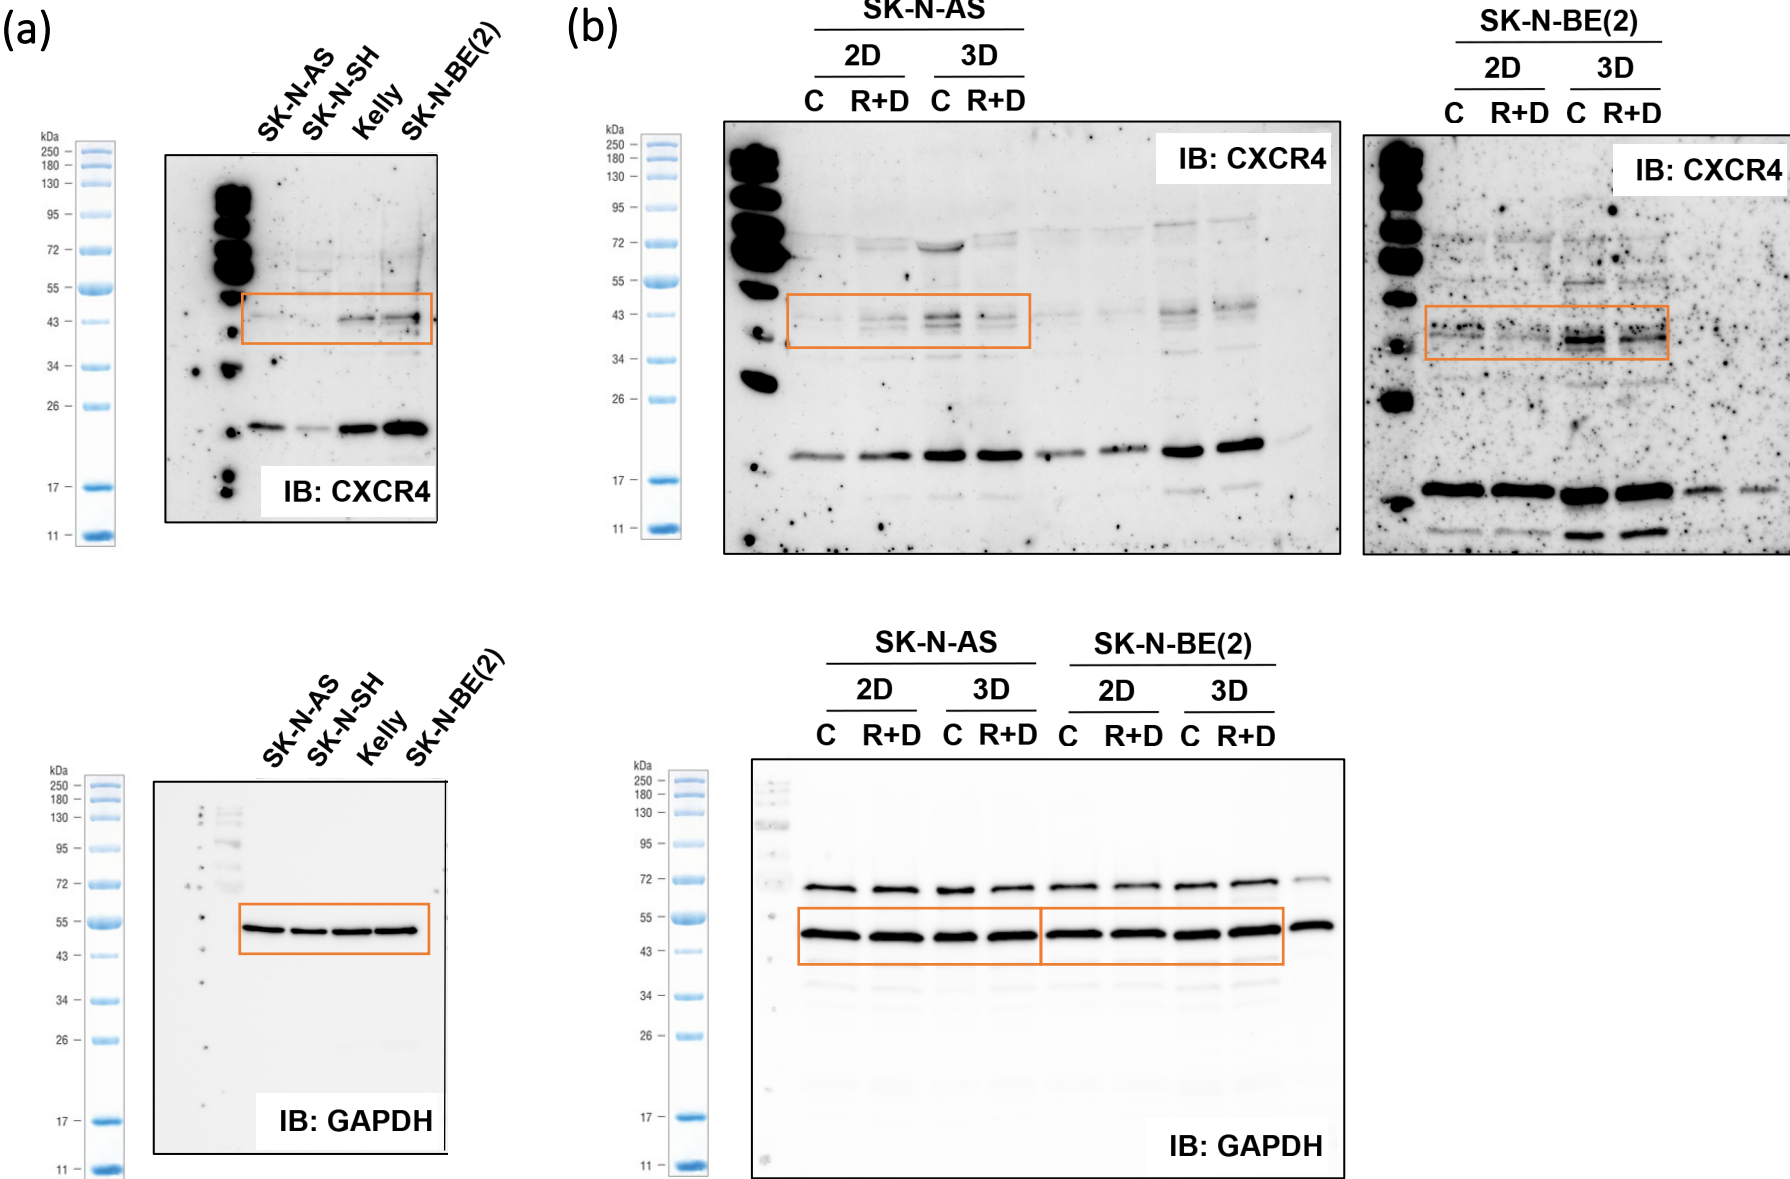

# BMI1 AND NANOG

(a)

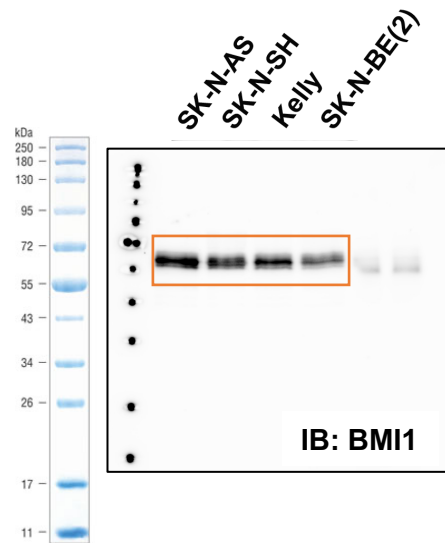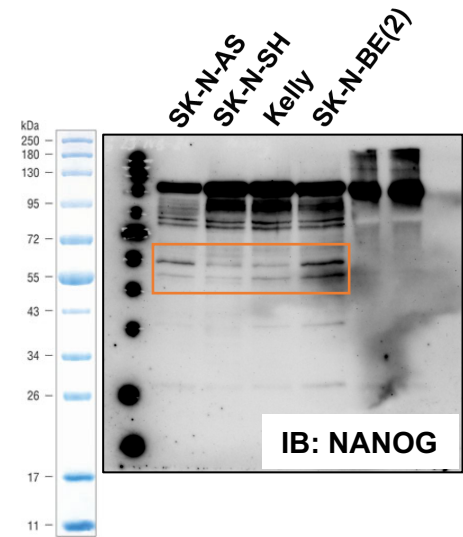

(b)

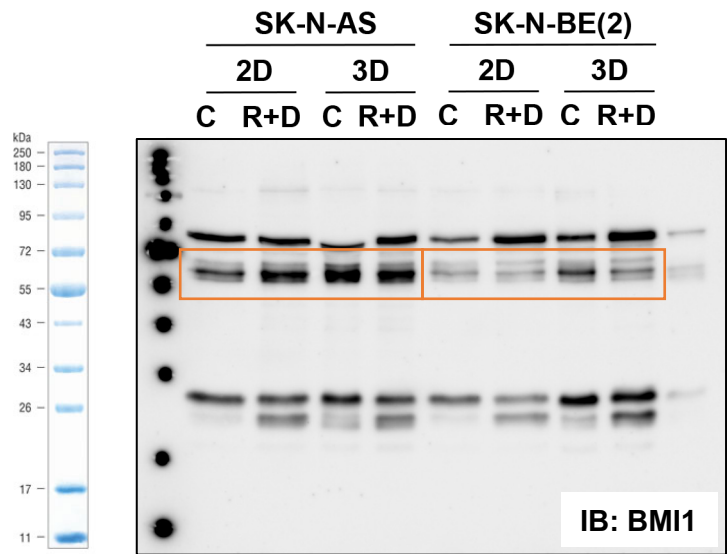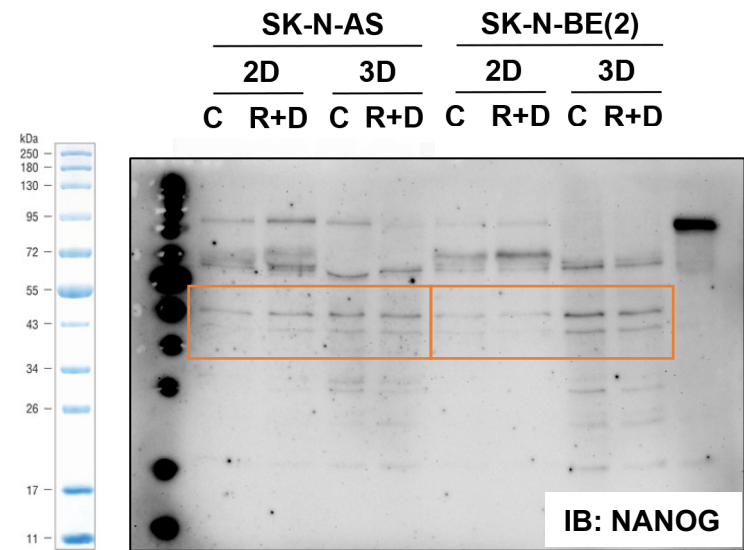



MycN, P-La (Thr 389) and La, GAPDH

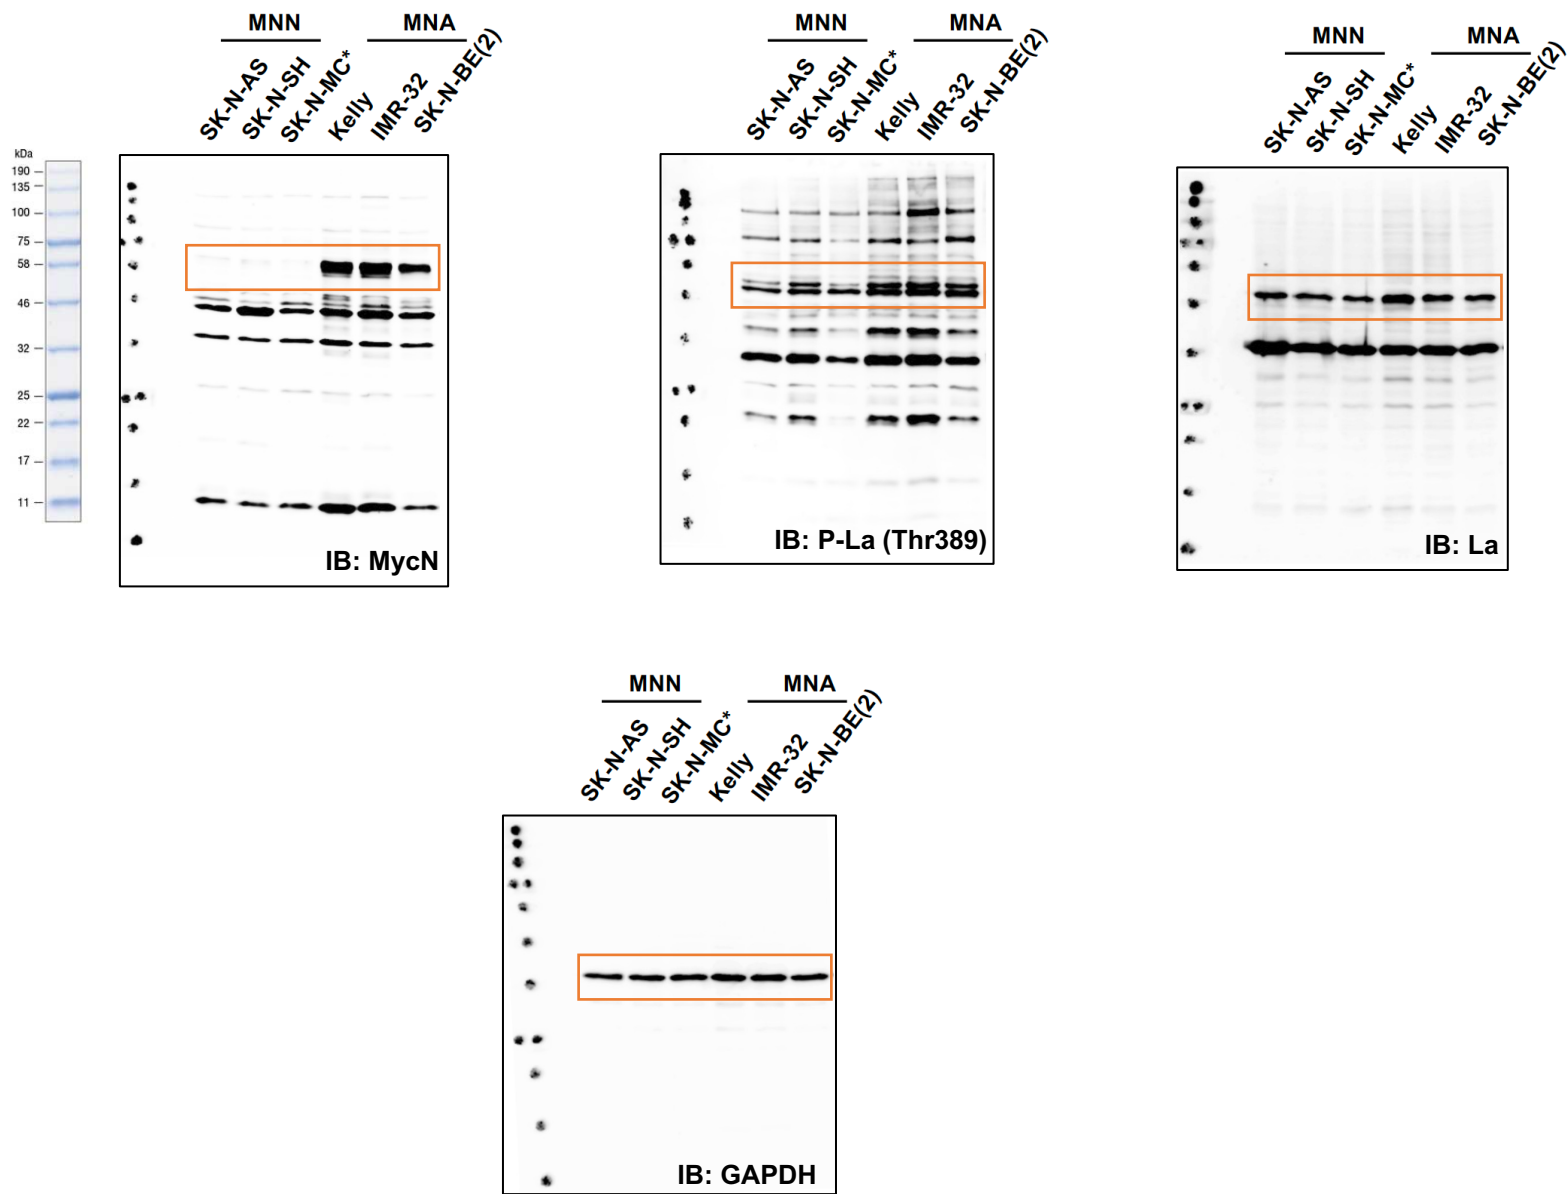

P-La (Thr 389) and La, GAPDH

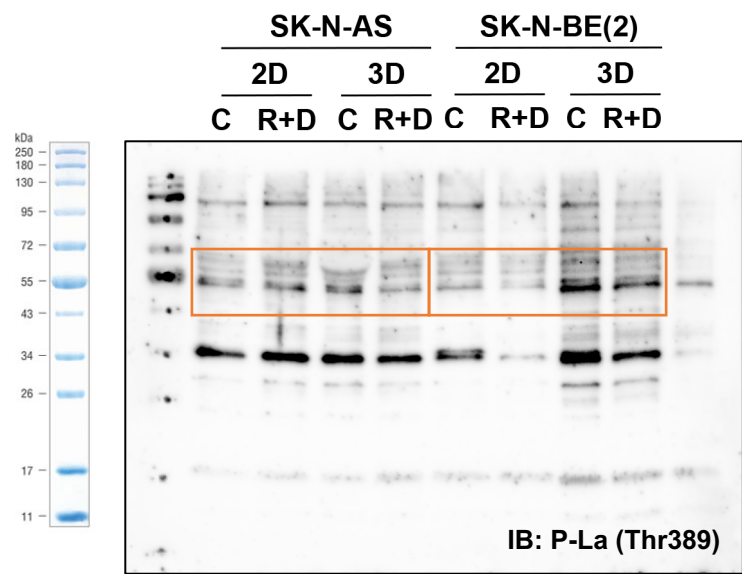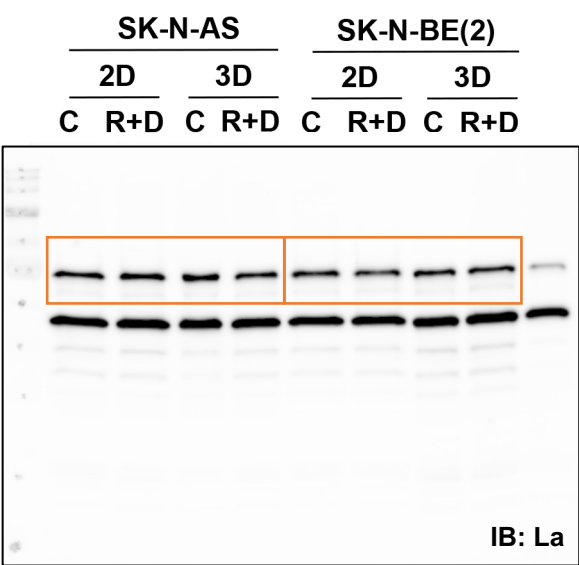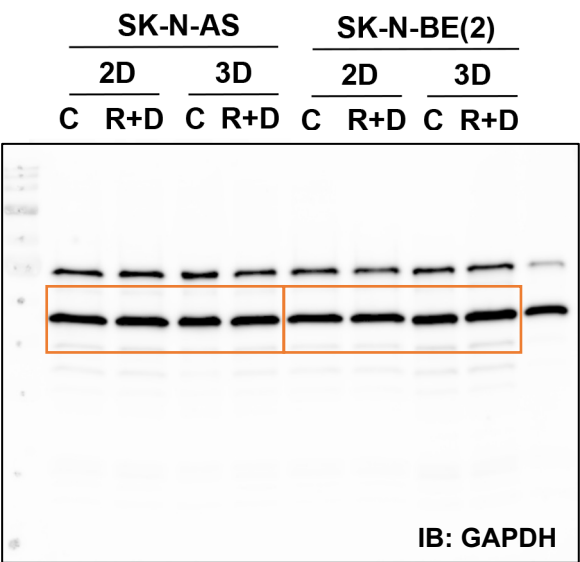

Supplement: s1 [file s1]
